# Supplementary material for: High performance N-doped porous activated carbon based on chicken feather for supercapacitors and CO2 capture
Source: Royal Society of Chemistry journal article supplement (doi:10.1039/c5ra01569c), 2015-01-01
Supplement: c5ra01569c1.pdf [file c5ra01569c1.pdf]

## Supporting Information

### High performance N-doped porous activated carbon based on chicken feather for supercapacitor

Zijian Zhao, Yong Wang, Min Li, Ru Yang\*

State Key Laboratory of Chemical Resource Engineering, Beijing Key Laboratory of Electrochemical Process and Technology for Materials, Beijing University of Chemical Technology, Beijing, P. R. China. Fax: +86 10 64436736; Tel: +86 10 64436736; E-mail: [ruyang@mail.buct.edu.cn](mailto:ruyang@mail.buct.edu.cn)

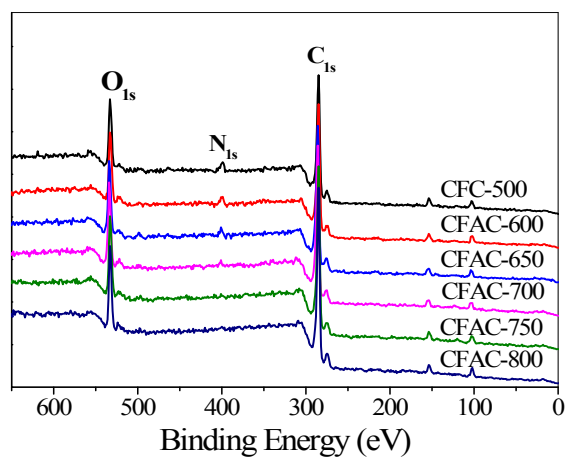

**Figure S1** XPS spectra of CFC-500 and the activated at samples.

**Table S1** Bulk elementary composition of the chicken feather and the as-prepared carbonized and activated samples.

| Sample        | C (wt%) | N (wt%) | H (wt%) | S (wt%) |
|---------------|---------|---------|---------|---------|
| CF            | 48.58   | 15.44   | 7.10    | 2.20    |
| CFC-250       | 60.97   | 15.22   | 5.31    | 0.66    |
| CFC-300       | 63.94   | 14.76   | 5.38    | 0.68    |
| CFC-400       | 64.38   | 14.45   | 3.92    | 0.52    |
| CFC-500       | 66.46   | 13.69   | 2.12    | 0.49    |
| CFC-600       | 72.29   | 12.83   | 1.96    | 0.44    |
| CFAC-600-4K   | 72.20   | 7.10    | 1.63    | 0.13    |
| CFAC-650-4K   | 80.26   | 5.25    | 0.81    | 0.11    |
| CFAC-700-4K   | 80.81   | 1.67    | 0.66    | 0.12    |
| CFAC-750-4K   | 90.80   | 1.25    | 0.37    | 0.18    |
| CFAC-800-4K   | 91.53   | 1.07    | 0.35    | 0.29    |
| CFAC-800-3K   | 87.38   | 2.08    | 0.47    | 0.17    |
| CFAC-800-5.5K | 91.52   | 1.33    | 0.39    | 0.21    |
